# Supplementary material for: Differences in attitudes to feeding post repair of Gastroschisis and development of a standardized feeding protocol
Source: BMC Pediatr. 2019 Dec 4;19:475. doi: 10.1186/s12887-019-1858-z (PMC6894280; doi:10.1186/s12887-019-1858-z)
Supplement: Supplementary file 1 — Additional file 1. Gastroschisis and Feeding Questionnaire. [file 12887_2019_1858_MOESM1_ESM.pdf]

## *Gastroschisis and Feeding Questionnaire.*

**What influences your practice in the management of infants with Gastroschisis?**

- a) Traditional management practices
- b) Current evidence and research
- c) Personal opinion and experience
- d) Other
- e) Comments

*The following questions are on gastric aspirates when **NIL BY MOUTH** infant:*

**Do you believe measuring the volume of gastric aspirates is an essential part of gastroschisis management?**

Yes ☐ No ☐ Not Sure ☐

*Please comment*

**Do you believe gastric aspirates are affected by the position of the infant at the time of measurement i.e. side lying, prone or supine?**

Yes ☐ No ☐

*Please comment*

**While an infant is nil by mouth, how often would you measure gastric aspirates?**

- a) Hourly
- b) Second hourly
- c) 3 – 4 hourly
- d) 6 – 8 hourly
- e) Other

*Please comment*

**Does the colour/composition of the gastric aspirate (i.e. dark green, blood stained) influence your decision to return or discard a gastric aspirate?**

Yes ☐ No ☐

*Please comment*

**While an infant is nil by mouth do you feel that a gastric aspirate should be:**

- a) Discarded
- b) All of the aspirate should be returned
- c) Part of the aspirate should be returned
- d) Other

*Please comment*

**If returning a gastric aspirate for an infant that is nil by mouth do you have a preference on the amount that should be returned?**

- a) Between 1-2mls/kg
- b) Between 3-4ml/kg
- c) Between 5-6ml/kg
- d) Return the entire aspirate
- e) I would discard the aspirate

*Please comment*

**When would you replace electrolytes intravenously?**

- a) When gastric aspirates are  
>10ml/kg/day

***Gastroschisis and Feeding Questionnaire.***

- b) When gastric aspirates are  
>20ml/kg/day
- c) Straight away
- d) After checking the aspirate electrolytes
- e) When serum electrolytes are deranged
- f) Other

*Please comment*

**To correct or maintain electrolytes in an infant with large gastric aspirates/large vomits you prefer to:**

- a) Increase the TFR (Total Fluid Requirement, generally TPN)
- b) Add a sideline of required fluid/electrolytes
- c) Other

*Please comment*

***The following questions relate to FEEDING infants with gastroschisis:***

**Who do you believe is the ultimate decision maker in commencing and grading up of feeds?**

- a) Consultant Surgeon
- b) Surgical Fellow/Registrar
- c) Consultant Neonatologist
- d) Neonatal Fellow/Registrar
- e) Nurse Practitioner
- f) Nurse Unit Manager
- g) Joint Decision

*Please comment*

**When would you commence trophic enteral feeds?**

- a) Within 4 hours after silo insertion/primary repair
- b) The first post-operative day
- c) Once bowel sounds can be auscultated
- d) When the aspirates are clear and minimal
- e) Not until the bowels have been opened
- f) Other

*Please comment*

**What do you believe is the best method of commencing feeds?**

- a) Continuous
- b) Every hour
- c) Every second hour
- d) Third hourly
- e) Every four hours
- f) Other

*Please comment*

**What do you believe is the best method of grading up feeds?**

- a) Continuous
- b) Every hour
- c) Every second hour
- d) Third hourly
- e) Every four hours
- f) Other

*Please comment*

## *Gastroschisis and Feeding Questionnaire.*

**If breast milk is unavailable do you have a preference for a type of formula to be used?**

Yes ☐ No ☐

**If Yes, would you choose**

- a) Standard
- b) Hydrolysed (e.g. Neocate)
- c) Semi Hydrolysed (e.g. Pepti Junior)
- d) Other, please specify

*Please comment*

**Do you think it is important to regularly check gastric residuals in infants with gastroschisis once feeding has commenced?**

Always ☐ Sometimes ☐ No ☐

*Please specify/comment*

**If returning a gastric residual (Infant on milk feeds) do you have a preference on the amount of residual that should be returned?**

- a) Between 1-2mls/kg
- b) Between 3-4ml/kg
- c) Between 5-6ml/kg
- d) Return the entire residual
- e) I would discard the residual

*Please comment*

**Your criteria for stopping feeds would be (*Please select all that apply*):**

- a) Infant deterioration (febrile, sepsis etc.)
- b) Abdominal distension, appearance, firmness
- c) Vomiting
- d) Large bilious aspirates >10ml/kg/day
- e) Unable to auscultate bowel sounds
- f) Large non-bilious aspirates
- g) Other

*Please comment*

**Do you believe that correct milk temperature (body temperature) encourages gastric motility?**

Yes ☐ No ☐

*Please comment*

**Do you believe offering oral sucking feeds encourages gastric motility?**

Yes ☐ No ☐

*Please comment*

### *General Questions*

**Do you believe the addition of an oral sodium supplement would assist with absorption of feeds in the small intestine and increase feed tolerance)?**

Yes ☐ No ☐

*Please comment*

**In your opinion would pro kinetic medications assist with improving gut motility in infants with gastroschisis?**

## ***Gastroschisis and Feeding Questionnaire.***

Yes ☐ No ☐

*Please comment*

**Do you believe suppositories should be used for infants with Gastroschisis?**

Yes ☐ No ☐

*Please comment*

**Do you think probiotics could be used as a possible adjunct treatment in infants with gastroschisis?**

Yes ☐ No ☐

*Please comment*

**Do you think a predictive bowel scoring method would assist in developing a multidisciplinary plan for infants with gastroschisis?** (*Gastroschisis prognostic score [www.capsnetwork.com.au](http://www.capsnetwork.com.au)*) (Cowan, Puilgandla, Laberge, et. al, 2012)

Yes ☐ No ☐

*Please comment*

**Do you believe a structured feeding plan for the management of feeding infants with Gastroschisis may prevent unnecessary stop/start of feeds?**

Yes ☐ No ☐

*Please comment*

**Is there anything else you would like to suggest that you think would improve**

**the management of infants with gastroschisis?**

*Please comment*

***Now for some questions about you:***

**Please indicate your position**

- a) Surgeon (Consultant, Fellow, Registrar)
- b) Neonatologist (Consultant, Fellow, Registrar)
- c) Nursing unit manager/Nursing Team Leader
- d) Clinical nurse specialist/Neonatal nurse practitioner
- e) Registered nurse

**How long have you worked in your current position?**

- a) More than 10 years
- b) Between 5 and 10 years
- c) Between 2 and 4 years
- d) Between 1 and 2 years
- e) Between 6 months and 1 year
- f) Less than 6 months

**How many gastroschisis infants have you cared for in the past 12 months?**

- a) 10 - 12
- b) 5 – 9
- c) 1 – 4
- d) None

***Thank you for participating.***
